# Supplementary material
Source: publisher site journal article supplement (http://kjim.org/upload/media/kjim-2021-410-suppl3.pdf)
Supplement: Supplementary file 1 [file kjim-2021-410-suppl3.pdf]

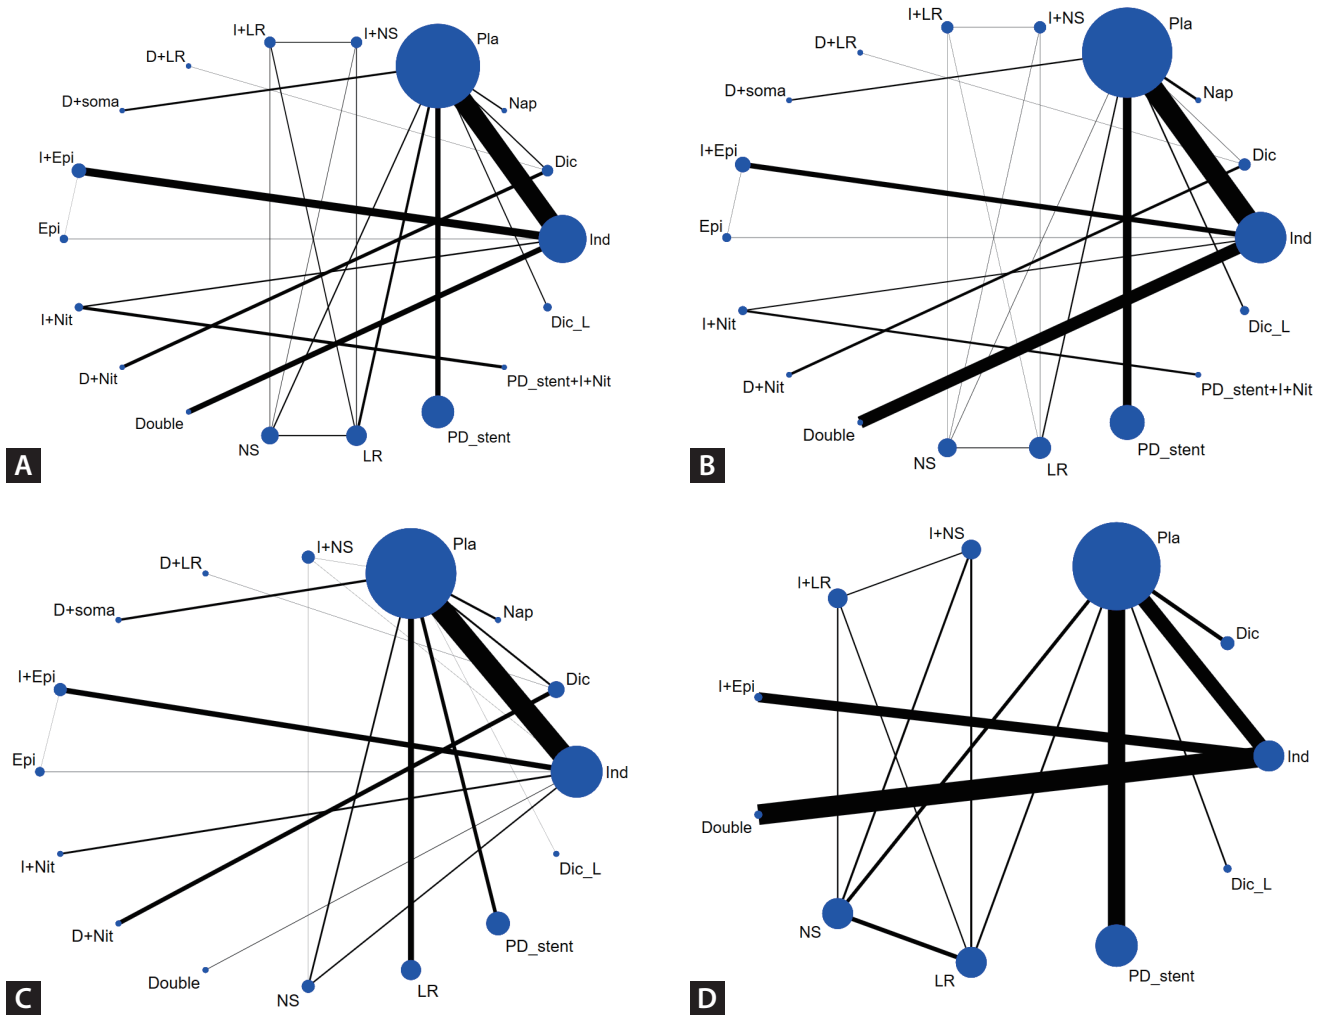

**Supplementary Figure 1.** Network plot of included studies comparing different prophylactic modalities for their efficacy to prevent post-endoscopic retrograde cholangiopancreatography (ERCP) pancreatitis (PEP). The nodes show a comparison of prophylactic modalities to prevent post-ERCP pancreatitis, and the edges show the available direct comparisons among the prophylactic modalities. The nodes and edges are weighed on the basis of the weights applied in network meta-analysis and inverse of standard error of effect. (A) Mild post-ERCP pancreatitis (PEP), (B) moderate-to-severe PEP, (C) average-risk group, (D) high-risk group. D or Dic, diclofenac; Dic\_L, diclofenac low dose; Double, double dose of indomethacin; Epi, epinephrine; I or Ind, indomethacin; LR, lactated Ringer’s solution; Nap, naproxen; Nit, nitrate; NS, normal saline; PD, pancreatic duct; Pla, placebo; soma, somatostatin.
